# Supplementary material for: Multiple analyses of large-scale genome-wide association study highlight new risk pathways in lumbar spine bone mineral density
Source: PubMed Central journal article supplement (PMC5058768; doi:10.18632/oncotarget.8948), 2016-04-23
Supplement: oncotarget-07-31429-s001.pdf [file oncotarget-07-31429-s001.pdf]

## **SUPPLEMENTARY TABLES**

### **Supplementary Table S1: All p-values of individual gene from ProxyGeneLD**

See Supplementary File 1

### **Supplementary Table S2: The detailed genes in significant KEGG pathways using gene from ProxyGeneLD**

See Supplementary File 2

### **Supplementary Table S3: All p-values of individual gene from PLINK**

See Supplementary File 3

### **Supplementary Table S4: The detailed genes in significant KEGG pathways using gene from PLINK**

See Supplementary File 4
